# Supplementary material for: Magnetically rewritable photonic ink based on superparamagnetic nanochains
Source: Royal Society of Chemistry journal article supplement (doi:10.1039/c3tc30765d), 2013-01-01
Supplement: c3tc30765d.pdf [file c3tc30765d.pdf]

## Magnetically Rewritable Photonic Ink Based on Superparamagnetic Nanochains

Mingsheng Wang, Le He, Yongxing Hu, Yadong Yin\*

Department of Chemistry, University of California, Riverside, CA 92521, USA

\*To whom correspondence should be addressed: Fax: 951-827-4713, E-mail: yadong.yin@ucr.edu,  
homepage: <http://faculty.ucr.edu/~yadongy/>

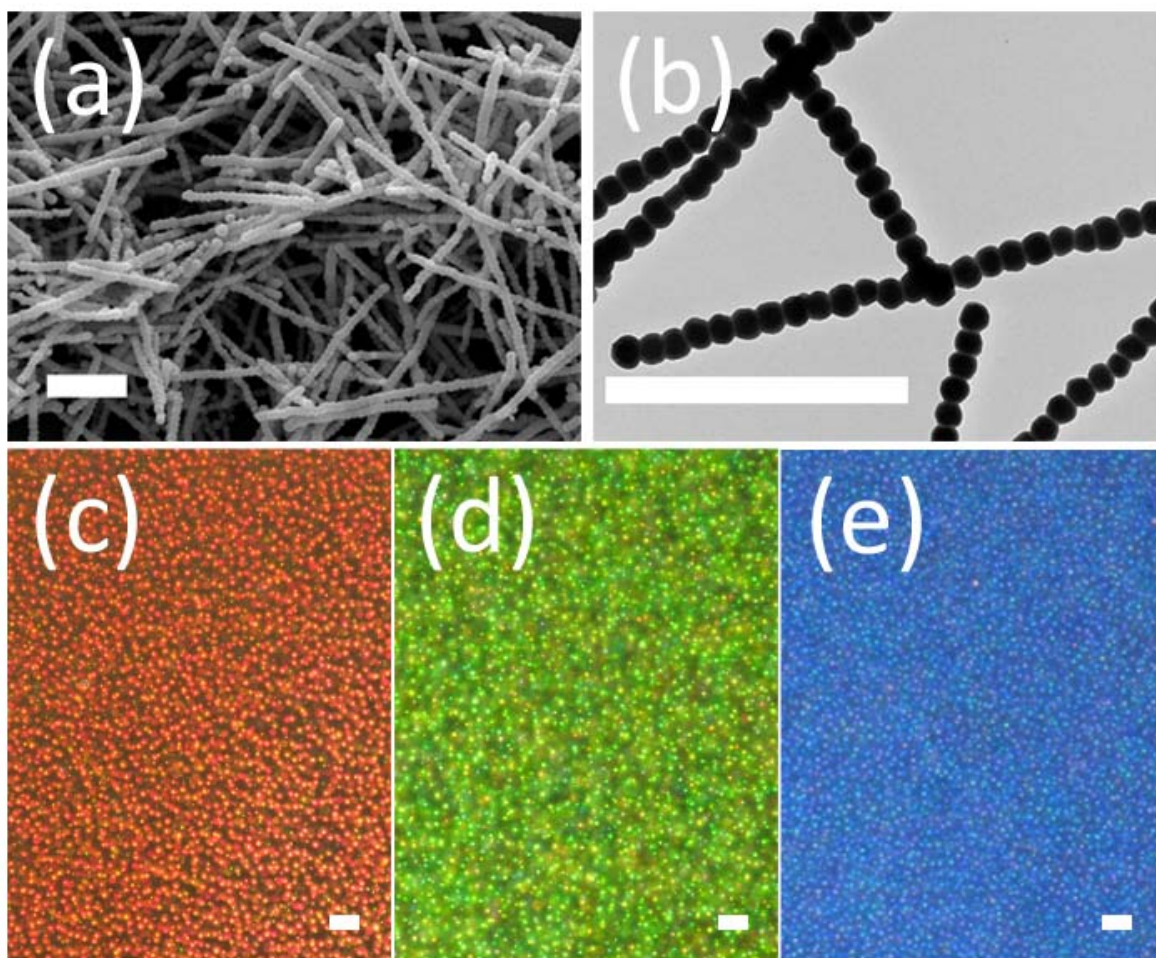

Figure S1: a) Additional SEM images of nanochains; scale bar: 2  $\mu\text{m}$ ; b) TEM images of nanochains, scale bar: 2  $\mu\text{m}$ ; c,d,e) Optical images of red, green and blue nanochains in the presence of a magnetic field parallel to the viewing angle; scale bar: 2  $\mu\text{m}$ .

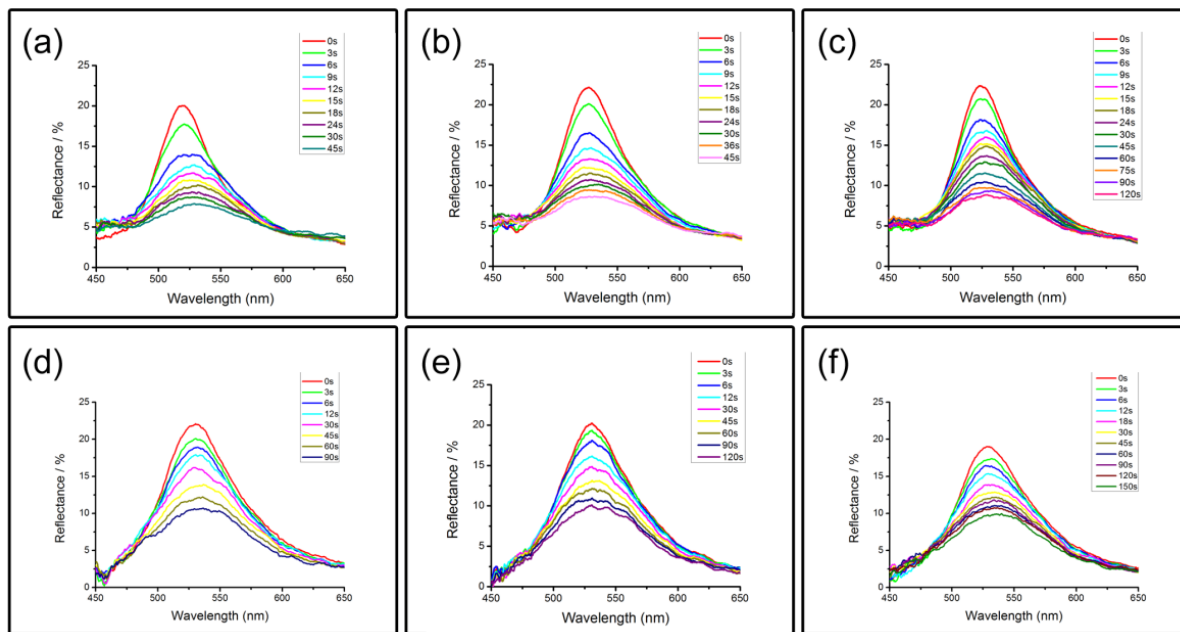

Figure S2: Reflectance Spectra of inks when different solvents are used as dispersants; a) DEG; b) TEG; c) PEG 400; d) 89% glycerol solution; e) 91% glycerol solution; f) 93% glycerol solution.
